# Supplementary material for: Dpp controls growth and patterning in Drosophila wing precursors through distinct modes of action
Source: eLife. 2017 Jul 4;6:e22546. doi: 10.7554/eLife.22546 (PMC5560859; doi:10.7554/eLife.22546)
Supplement: Figure 1—source data 1. — DOI: http://dx.doi.org/10.7554/eLife.22546.004 [file elife-22546-fig1-data1.xlsx]

## Sheet: 96 hours AEL
	WILDTYPE
	Disc Number	Area (μm2)
	1	19190.6
	2	20068.9
	3	19263.5
	4	20458.3
	5	19447.4
	6	22115.4
	7	15369
	8	19639.1
	9	20159.5
	10	17710.2
	11	29368.7
	12	18500.4
	13	23476
	14	22059.7
	15	22070.6
	16	32956.5
	17	31742.5
	18	24138.1
	Mean	22096.3
	MUTANT
	Disc Number	Area (μm2)
	1	7580.05
	2	9944.35
	3	8122.92
	4	6326.76
	5	7351.93
	6	7724.45
	7	15959.8
	8	10203.9
	9	8315.74
	10	11734.7
	11	9437.58
	12	8661.71
	13	9250.72
	14	8177.72
	15	8150.67
	Mean	9129.54

## Sheet: 120 hours AEL
	WILDTYPE
	Disc Number	Area (μm2)
	1	66255.5
	2	55193.9
	3	47977.8
	4	51431.4
	5	67948.7
	6	45896
	7	57647.5
	8	64141.4
	9	59292.2
	10	64601.9
	11	68488.9
	12	53021.3
	13	52989.4
	14	68345.5
	15	72480.7
	16	71408.2
	17	49719.2
	18	48045.5
	19	55291.9
	20	53850.1
	Mean	58701.3
	MUTANT
	Disc Number	Area (μm2)
	1	17915.1
	2	18074.1
	3	20271.8
	4	18277.1
	5	25641.2
	6	25758.1
	7	19776.8
	8	28733.2
	9	32369.7
	10	24178.6
	11	26409.1
	12	27252
	13	28797.2
	14	24361.4
	15	25915.3
	16	21392.6
	Mean	24070.2
