# Supplementary material for: Dpp controls growth and patterning in Drosophila wing precursors through distinct modes of action
Source: eLife. 2017 Jul 4;6:e22546. doi: 10.7554/eLife.22546 (PMC5560859; doi:10.7554/eLife.22546)
Supplement: Figure 4—source data 1. — DOI: http://dx.doi.org/10.7554/eLife.22546.014 [file elife-22546-fig4-data1.xlsx]

## Sheet: Sheet1
Primer name	Length	Sequence
SPLNK#1	28	CGAAGAGTAACCGTTGCTAGGAGAGACC
5'SPLNK#1-GAWB	20	TGGGAGAGTAGCGACACTCC
SPLNK#2	25	GTGGCTGAATGAGACTGGTGTCGAC
5'SPLNK#2-GAWB	25	GAGCTTTTTAAGTCGGCAAATATCG
5'SPLNK-GAWB-SEQ	18	CTCAACAAGCAAACGTGC
Brk qRT-PCR F	20	CGCCGGCAAATCCAAAAATG
Brk qRT-PCR R	20	TGCTGTTGCTGATTGTTGGC
