# Supplementary material for: Dpp controls growth and patterning in Drosophila wing precursors through distinct modes of action
Source: eLife. 2017 Jul 4;6:e22546. doi: 10.7554/eLife.22546 (PMC5560859; doi:10.7554/eLife.22546)
Supplement: Figure 4—source data 2. — DOI: http://dx.doi.org/10.7554/eLife.22546.015 [file elife-22546-fig4-data2.xlsx]

## Sheet: Sheet1
	Control			HS @ 102 h AEL
	Mean	SEM	n	Mean	SEM	n
dppFRT-PSB	1	0.123	3	3.076	0.489	3
dppFRT-CA	1	0.133	3	4.409	0.542	3
dppFRT-TA	1	0.134	3	1.991	0.188	3
