# Supplementary material for: Dpp controls growth and patterning in Drosophila wing precursors through distinct modes of action
Source: eLife. 2017 Jul 4;6:e22546. doi: 10.7554/eLife.22546 (PMC5560859; doi:10.7554/eLife.22546)
Supplement: Figure 5—source data 1. — DOI: http://dx.doi.org/10.7554/eLife.22546.018 [file elife-22546-fig5-data1.xlsx]

## Sheet: Non-rescued discs
	RESCUED DISCS
	Number of PH3 spots	Area (μm2)	Relative Area (μm2)	Mitotic Density (per 100 μm2)
	140	23765.1	237.651	0.589098
	115	33616	336.16	0.342099
	148	22238.9	222.389	0.665499
	185	49665.2	496.652	0.372494
	166	51879	518.79	0.319975
	92	24868.5	248.685	0.369946
	119	27406.9	274.069	0.434198
	135	51879	518.79	0.260221
	163	21973.7	219.737	0.741797
	81	13413.2	134.132	0.603882
	36	13418.1	134.181	0.268295
	62	12560.6	125.606	0.493605
	73	14458	144.58	0.50491
	83	12624	126.24	0.657476
	Mean			0.473107
	NON-RESCUED DISCS
	Number of PH3 spots	Area (μm2)	Relative Area (μm2)	Mitotic Density (per 100 μm2)
	18	5180.46	51.805	0.34746
	11	5597.13	55.971	0.196529
	22	6643.09	66.431	0.331171
	19	6438.83	64.388	0.295085
	20	7941.53	79.415	0.25184
	24	6966.08	69.661	0.344526
	31	7245.52	72.455	0.42785
	22	6595.16	65.952	0.333578
	14	6274.25	62.742	0.223134
	38	8148.88	81.489	0.466322
	24	8179.11	81.791	0.293431
	Mean			0.319175
	WILDTYPE
	Number of PH3 spots	Area (μm2)	Relative Area (μm2)	Mitotic Density (per 100 μm2)
	138	25157.9	251.579	0.548535
	175	30039.2	300.392	0.582572
	127	40525.8	405.258	0.313381
	120	25838.4	258.384	0.464425
	172	40446.4	404.464	0.425254
	145	38117	381.17	0.380408
	150	22687.5	226.875	0.661157
	113	18709.2	187.092	0.603981
	80	13584.3	135.843	0.588915
	Mean			0.507625
