# Supplementary material for: Dpp controls growth and patterning in Drosophila wing precursors through distinct modes of action
Source: eLife journal article supplement (doi:10.7554/elife.22546), 2017-07-04
Supplement: supp [file elife_poa_e22546_Figure_1_Source_Data_1.xlsx]

## Sheet: Sheet1
	WILDTYPE			MUTANT
	Disc Number	Area (μm2)		Disc Number	Area (μm2)
	1	66255.5		1	3308.62
	2	55193.9		2	6214.18
	3	47977.8		3	3401.3
	4	51431.4		4	13946.1
	5	67948.7		5	15132.6
	6	45896		6	16824.2
	7	57647.5		7	12905.8
	8	64141.4		8	8667.58
	9	59292.2		9	7000.19
	10	64601.9		10	5334
	11	68488.9		11	10635.4
	12	53021.3		12	9992.88
	13	52989.4		13	10413.6
	14	68345.5		Mean	9521.26
	15	72480.7
	16	71408.2
	17	49719.2
	18	48045.5
	19	55291.9
	20	53850.1
	Mean	58701.3
