# Supplementary figures and images for: Dpp controls growth and patterning in Drosophila wing precursors through distinct modes of action
Source: eLife journal article supplement (doi:10.7554/elife.22546), 2017-07-04

Figure 1 - figure supplement 1.

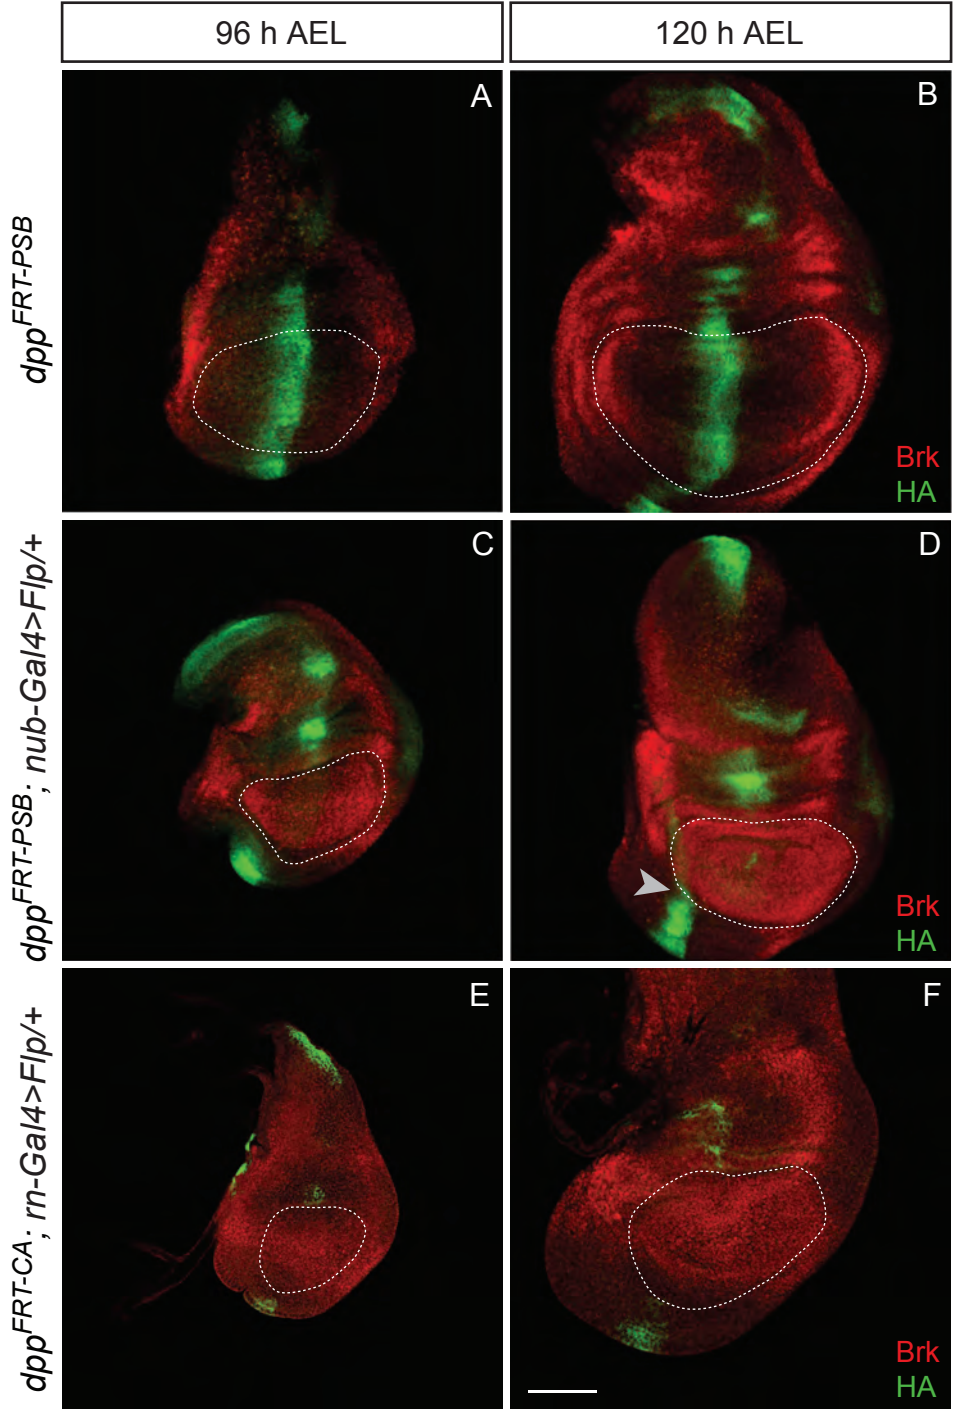

Supplement: supp [file elife_poa_e22546_Figure_1_Figure_Supplement_1.pdf › elife_poa_e22546_Figure_1_Figure_Supplement_1.pdf]

Figure 3 - figure supplement 2.

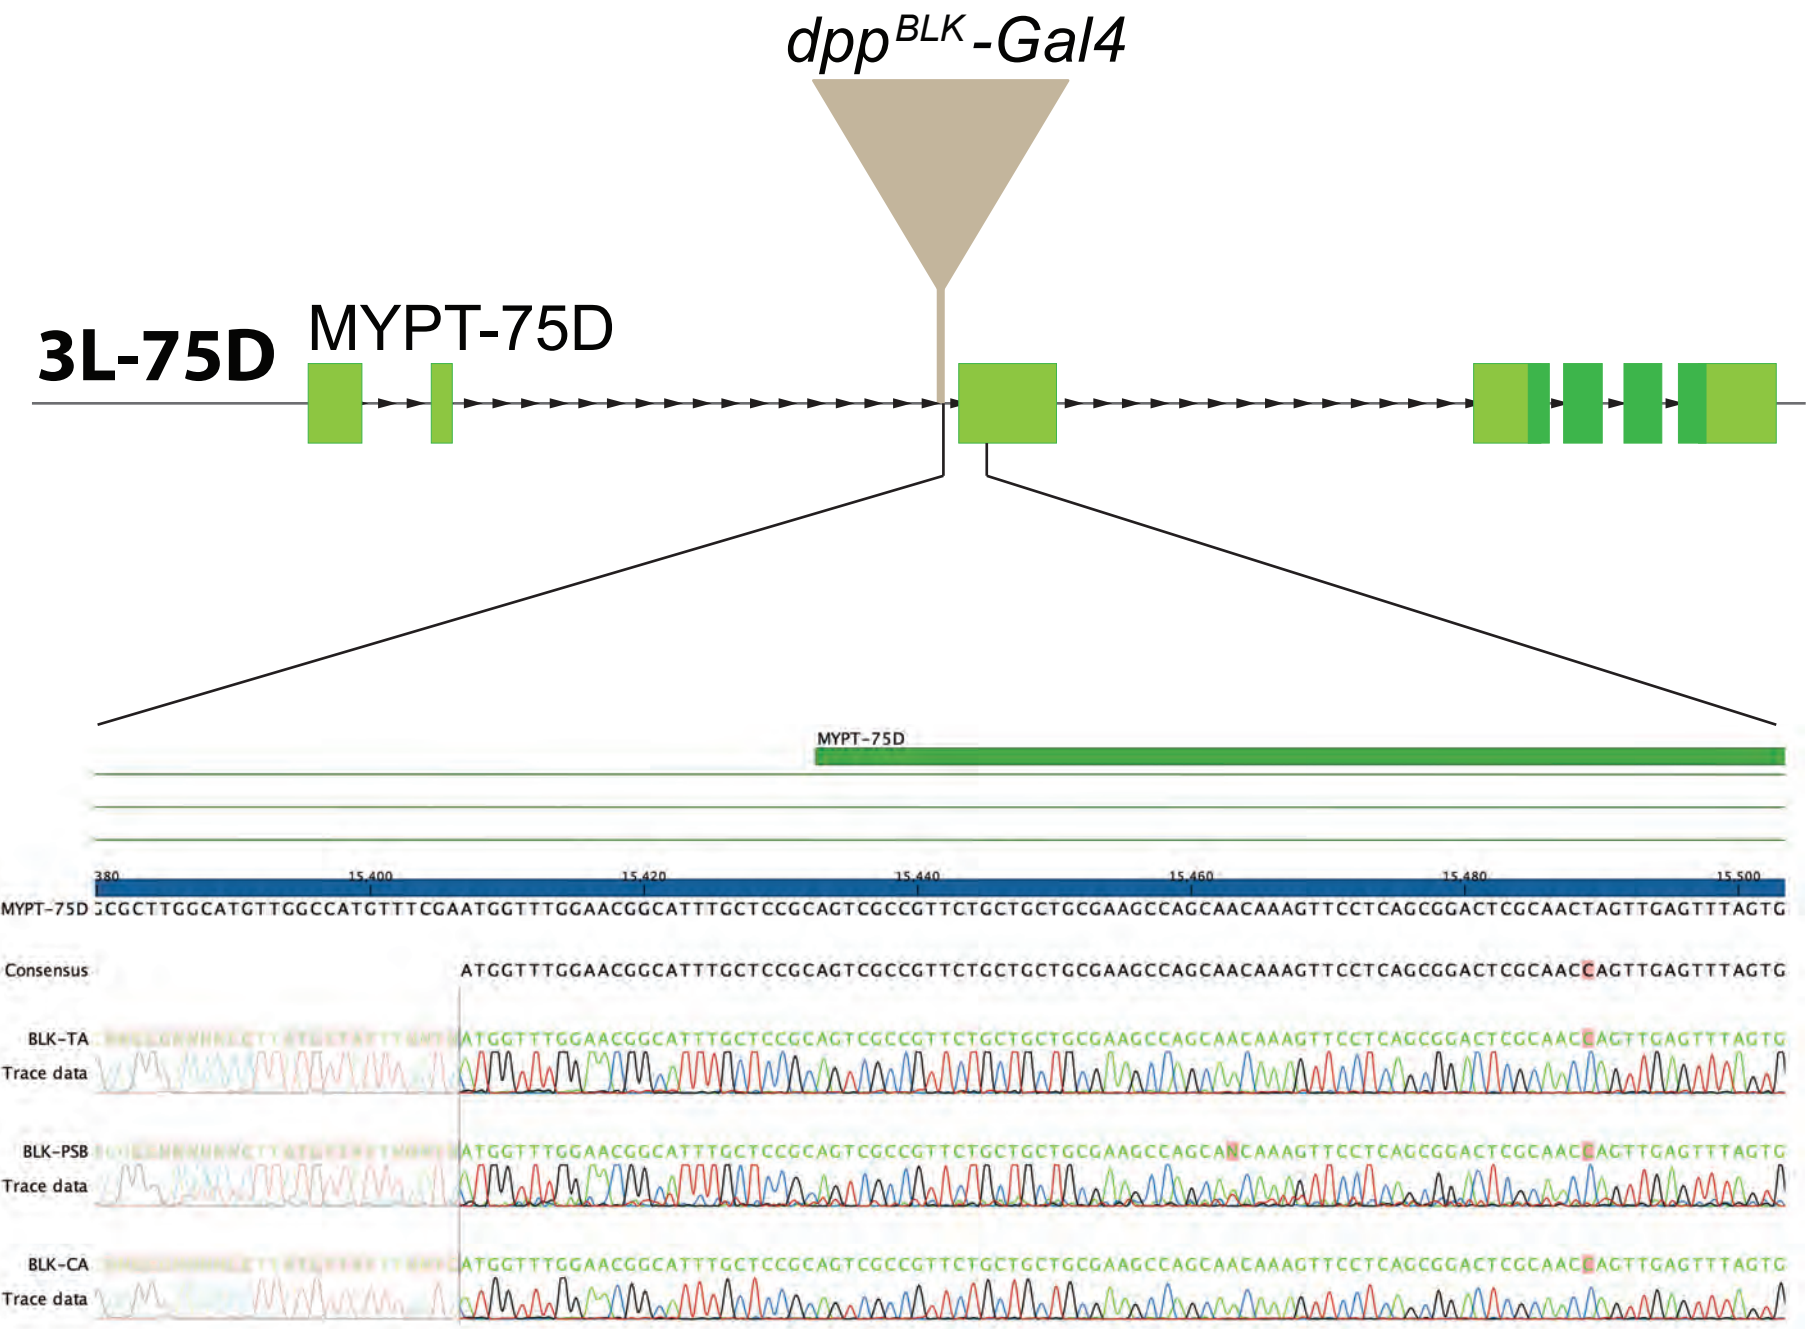

Supplement: supp [file elife_poa_e22546_Figure_2_Figure_Supplement_2.pdf › elife_poa_e22546_Figure_2_Figure_Supplement_2.pdf]

Figure 3 - figure supplement 1.

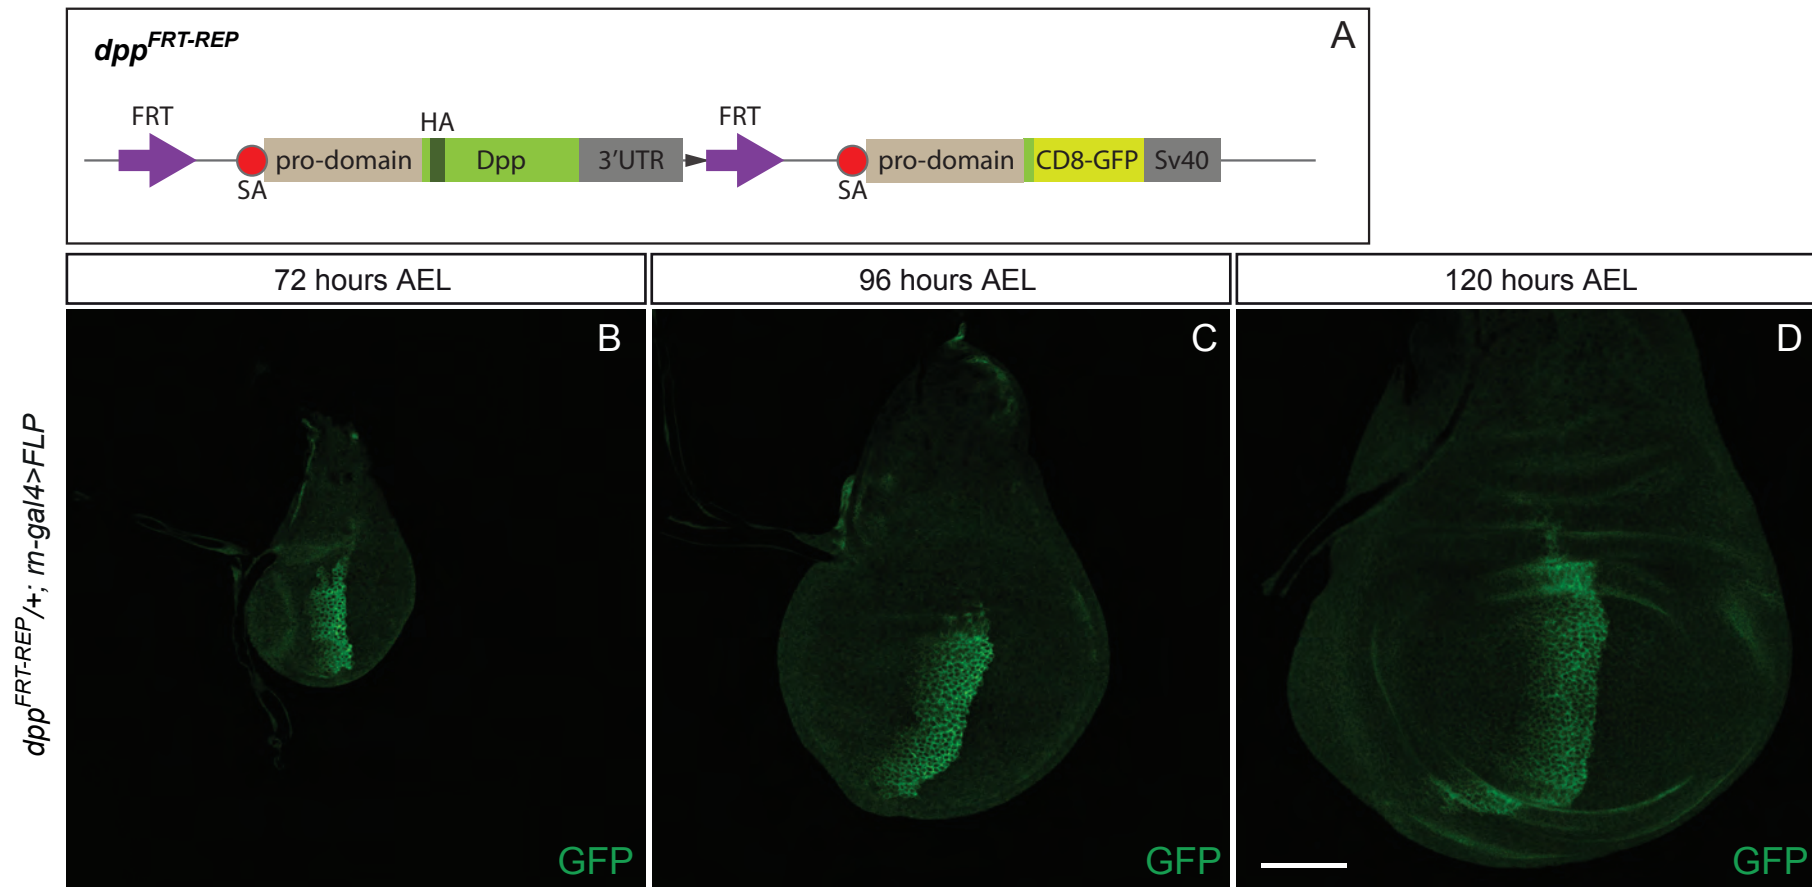

Supplement: supp [file elife_poa_e22546_Figure_3_Figure_Supplement_1.pdf › elife_poa_e22546_Figure_3_Figure_Supplement_1.pdf]

Figure 3 - figure supplement 3.

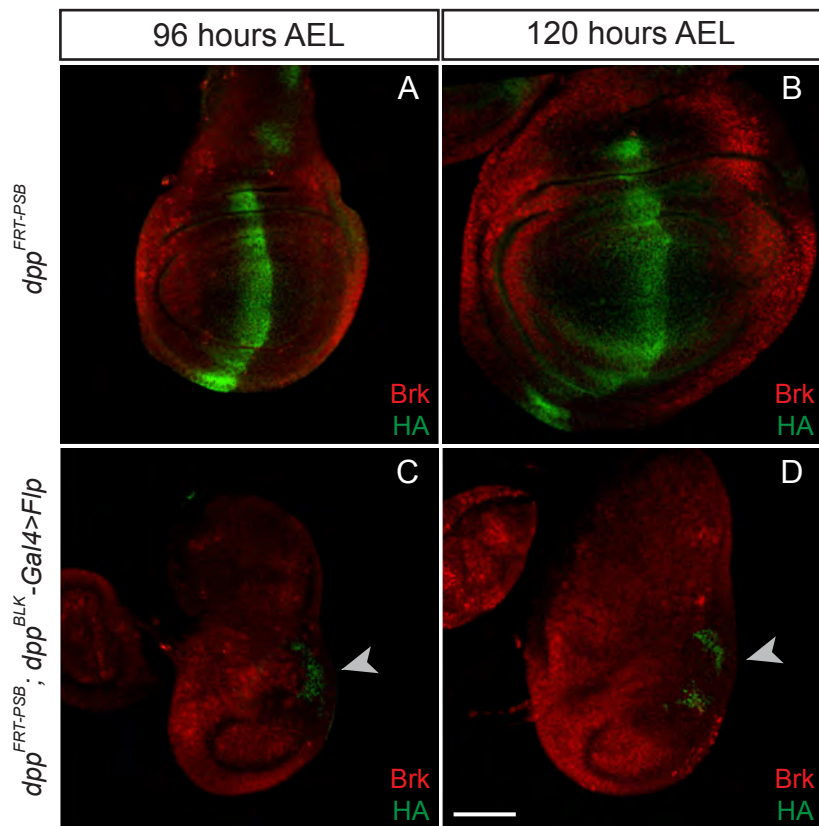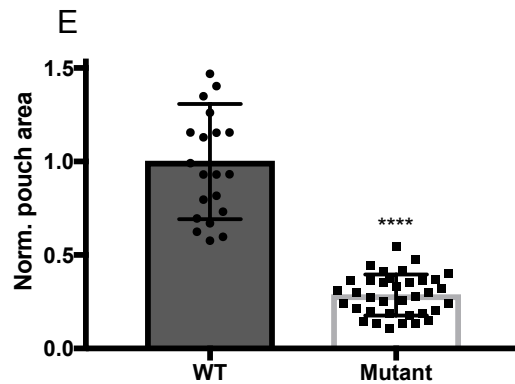

Supplement: supp [file elife_poa_e22546_Figure_3_Figure_Supplement_3.pdf › elife_poa_e22546_Figure_3_Figure_Supplement_3.pdf]
